# Supplementary material
Source: publisher figshare collection journal article supplement (https://acs.figshare.com/ndownloader/files/13107170)
Supplement: Supplementary file 1 [file 13107170]

---

# Supporting Information

## Microneedle-Mediated Delivery of Lipid-Coated Cisplatin Nanoparticles for Efficient and Safe Cancer Therapy

*Xinmiao Lan<sup>1</sup>, Juncong She<sup>2</sup>, Di-an Lin<sup>2</sup>, Yu Xu<sup>3</sup>, Xuan Li<sup>4</sup>, Wei-fa Yang<sup>1</sup>, Vivian Wai Yan*

*Lui<sup>5</sup>, Lijian Jin<sup>4</sup>, Xi Xie<sup>2,6\*</sup>, Yu-xiong Su<sup>1,\*</sup>*

1. Discipline of Oral and Maxillofacial Surgery, Faculty of Dentistry, The University of Hong Kong, Hong Kong SAR, China
2. State Key Laboratory of Optoelectronic Materials and Technologies, School of Electronics and Information Technology; Guangdong Province Key Laboratory of Display Material and Technology, Sun Yat-Sen University, Guangzhou, China
3. School of Chinese Medicine, Li Ka Shing Faculty of Medicine, The University of Hong Kong, Hong Kong SAR, China
4. Discipline of Periodontology, Faculty of Dentistry, The University of Hong Kong, Hong Kong SAR, China
5. School of Biomedical Sciences, Faculty of Medicine, The Chinese University of Hong Kong, Hong Kong S.A.R., China
6. The First Affiliated Hospital of Sun Yat-Sen University, Guangzhou, China

\*Corresponding author

Email: Yu-xiong Su: richsu@hku.hk; Xi Xie: xiexi27@mail.sysu.edu.cn

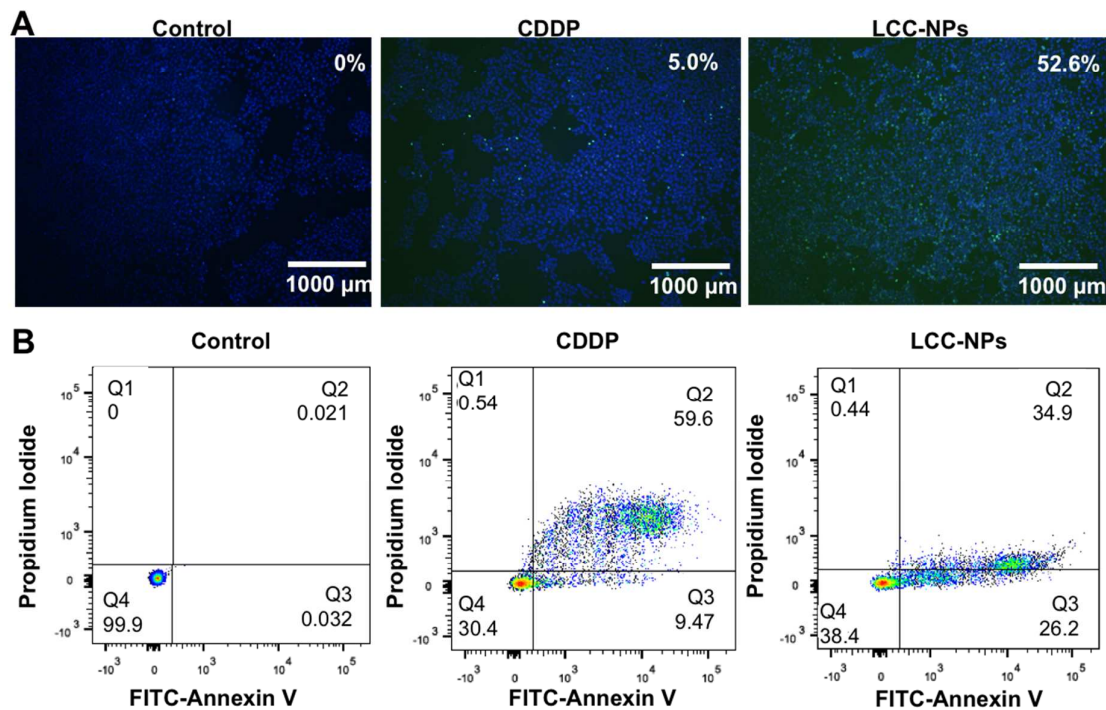

**Figure S1.** (A) After the treatment of CDDP or LCC-NPs for 4 h, the apoptotic DNA fragmentation in the treated CAL 27 cells were studied using *in situ* TUNEL assay followed by fluorescent imaging (B) CAL 27 cells were stained with annexin V conjugated FITC and PI. The cell apoptosis was analyzed using flow cytometry.

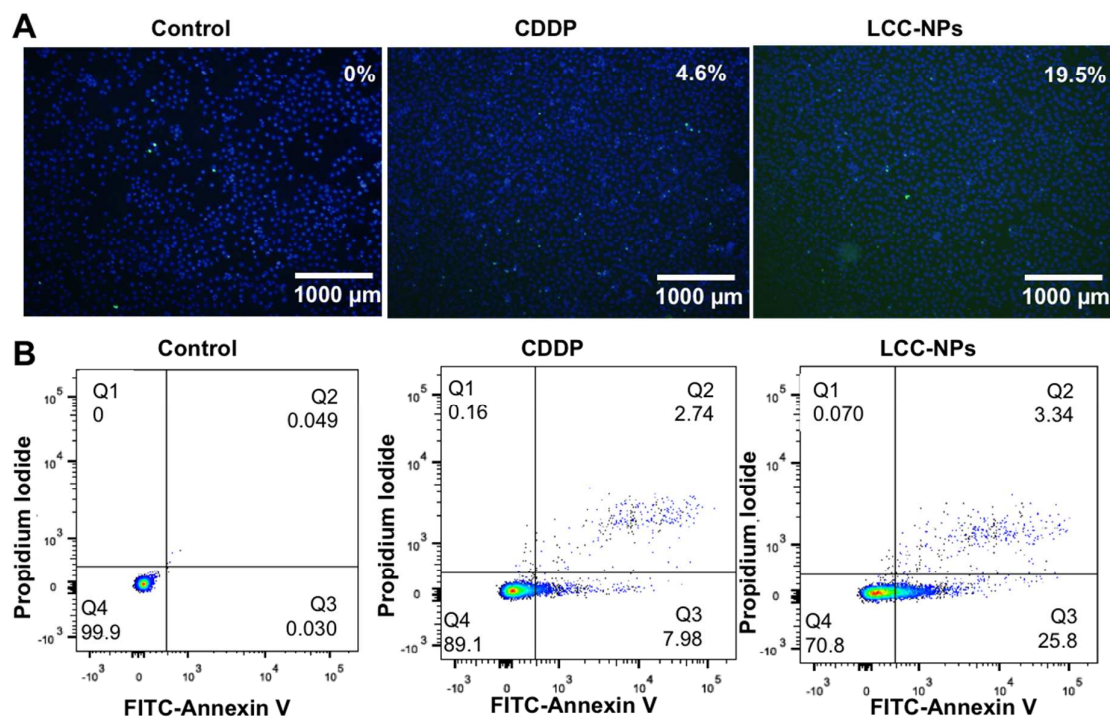

**Figure S2.** (A) After the treatment of CDDP or LCC-NPs for 4 h, the apoptotic DNA fragmentation in the treated SCC 15 cells were studied using *in situ* TUNEL assay followed by fluorescent imaging (B) SCC 15 cells were stained with annexin V conjugated FITC and PI. The cell apoptosis was analyzed using flow cytometry.

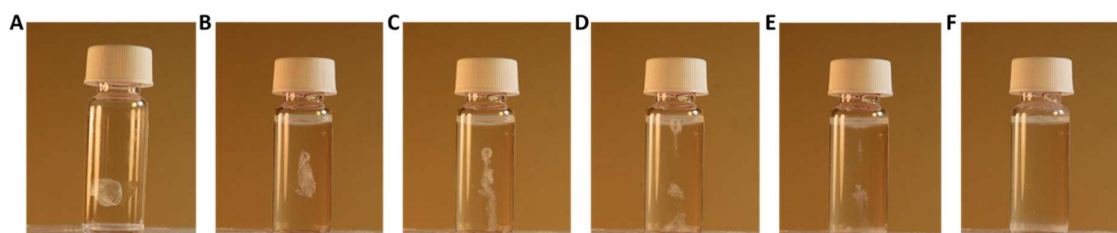

**Figure S3.** Dissolving process of SCMC material in water (A. Starting point; B. 5s; C. 30s; D. 1min; E. 3min; F. 5min).

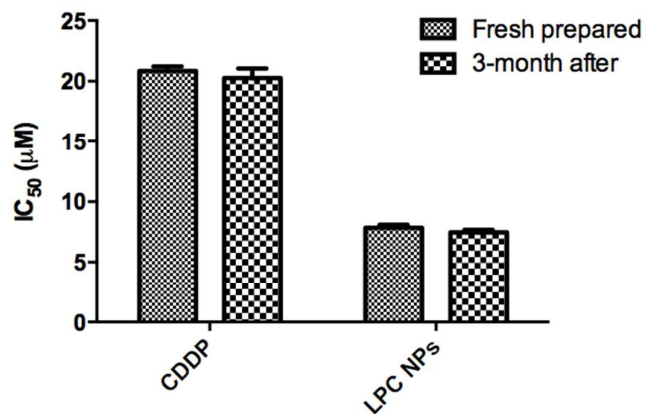

**Figure S4.**  $IC_{50}$  value of CDDP and LCC-NPs 3 months after prepared compared with the fresh prepared drugs on CAL 27 cell line. No significant difference was detected.

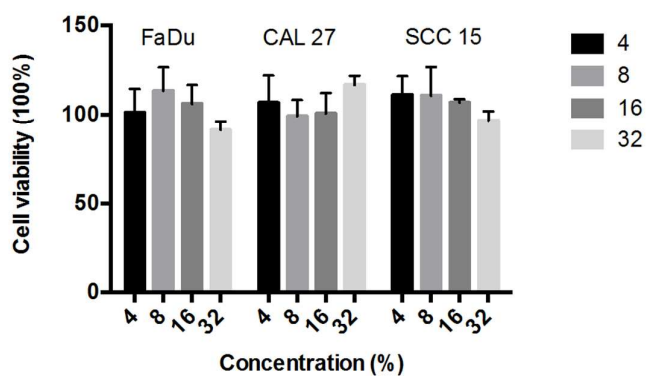

**Figure S5.** Cell viability of three HNSCC cell lines when treated with different concentration of SCMC.
